# Supplementary material
Source: PubMed Central journal article supplement (PMC10112881)
Supplement: NIHMS1890052-supplement-SupplementalMaterial.pdf [file NIHMS1890052-supplement-SupplementalMaterial.pdf]

## Supplemental Information

### **Figure S1. 5-HT GPCRome and second messenger assays comparing LSD to 2-Br-LSD.** *Related to Figures 1 and 2.*

(A) Concentration-response curves for 2-Br-LSD (blue) compared to LSD (red) and 5-HT (black) at each of the 5-HT receptor subtypes measuring indicated G protein subtype dissociation by BRET. Data represent mean and SEM from at least n=3 independent experiments performed in triplicate. Data were normalized to % 5-HT maximum stimulation, and parameter estimates are reported in Table S2. (B) Second messenger confirmatory assays measuring Gi/o-mediated cAMP inhibition (5-HT<sub>1A/1B/1F</sub> and D<sub>2/4</sub> receptors), Gq-mediated calcium flux (5-HT<sub>2A/2B/2C</sub>) or Gs-mediated cAMP accumulation (5-HT<sub>6</sub> and 5-HT<sub>7a</sub>). Data represent mean and SEM from at least n=3 independent experiments performed in triplicate. Data were normalized to either 5-HT maximum stimulation (for 5-HT receptors) or dopamine maximum stimulation for dopamine receptors.

Fig. S1

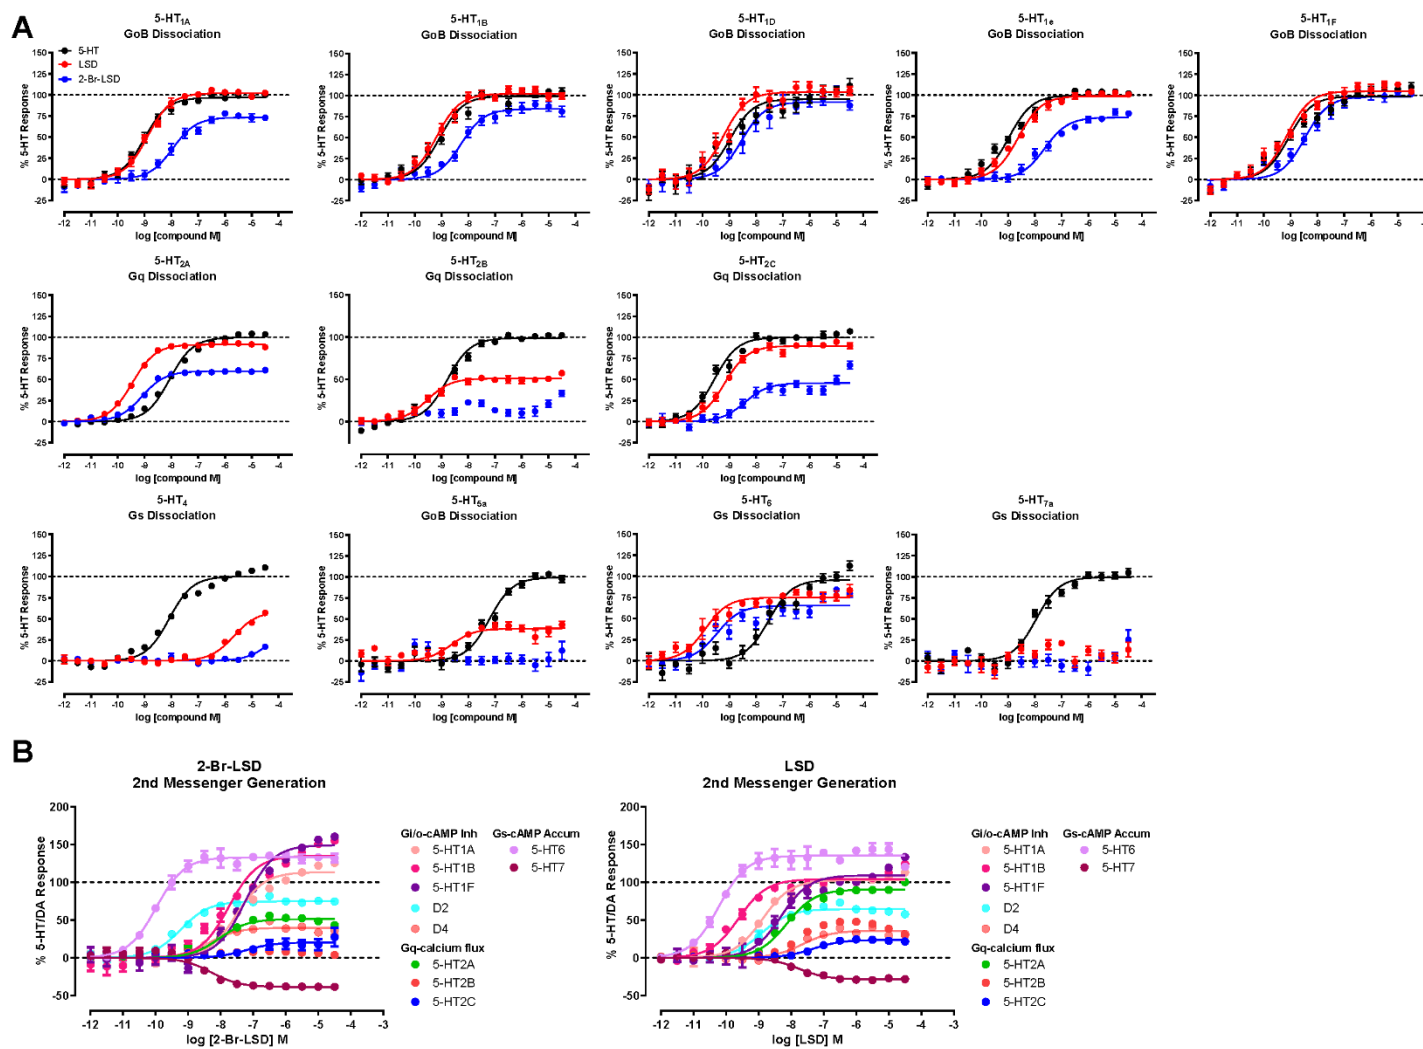

**Figure S2. Amingeric GPCRome comparing LSD to 2-Br-LSD. Related to Figure 1.**

Concentration-response curves for 2-Br-LSD (blue) compared to LSD (red) and specific positive control (black) tested in agonist mode at (A) dopamine receptor subtypes, (B) adrenergic  $\alpha$ 1 and  $\alpha$ 2 subtypes, (C) adrenergic  $\beta$  subtypes, (D) histamine subtypes, and (E) muscarinic acetylcholine subtypes. Each data set represents mean and SEM that is normalized to percent positive control response (DA dopamine, NE norepinephrine for  $\alpha$ 1,  $\alpha$ 2, and  $\beta$ 1 subtypes, Epi/Epinephrine for  $\beta$ 2 subtype, histamine for histamine subtypes, and pilocarpine for muscarinic subtypes. Data represent mean and SEM from at least n=3 independent experiments performed in triplicate. Data were normalized to either percent maximum positive control stimulation.

Fig. S2

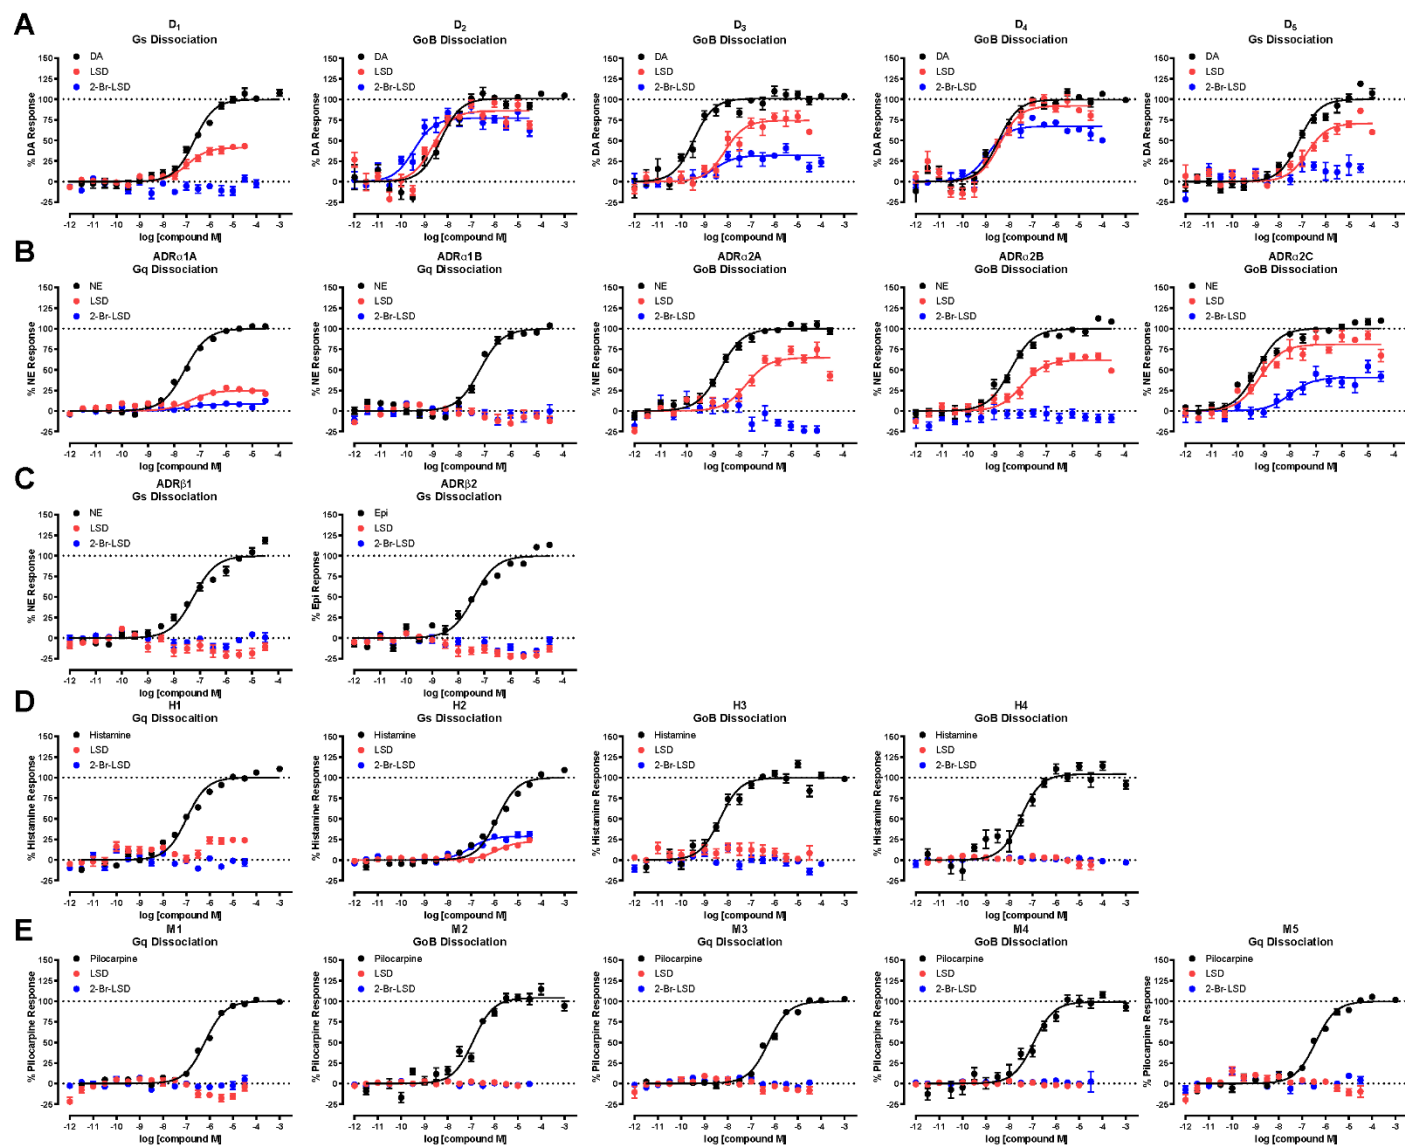

**Figure S3. 2-Br-LSD Brain and Plasma Pharmacokinetics and HTR blockade studies.**  
*Related to Figure 2.*

(A) Brain concentration-time curves for 2-Br-LSD in female mice. Data are presented as group means  $\pm$  SEM. 2-Br-LSD was injected at  $t = 0$ . (B) Plasma concentration-time curves for 2-Br-LSD in male mice. (C) Plasma concentration-time curves for 2-Br-LSD in female mice. (D) Pretreatment with the 5-HT<sub>1A</sub> antagonist WAY-100,635 did not alter the effect of 2-Br-LSD on the head-twitch response (HTR). Mice were pretreated with vehicle or WAY-100,635 (1 mg/kg), vehicle or 2-Br-LSD (3 mg/kg) was injected 20 min later, and then HTR activity was recorded. Data are presented as group means  $\pm$  SEM for the entire 30-minute test session. (E) Pretreatment with the D<sub>2/3</sub> antagonist S(-)-raclopride did not alter the effect of 2-Br-LSD on the HTR. Mice were pretreated with vehicle or S(-)-raclopride (1 mg/kg) vehicle or 2-Br-LSD (3 mg/kg) was injected 20 min later, and then HTR activity was recorded. Data are presented as group means  $\pm$  SEM for the entire 30-minute test session. \* $p < 0.05$ , significant difference between groups (Tukey's test). (F) Effect of pretreatment with the D<sub>2/3</sub> agonist (-)-quinpirole on the HTR induced by 2,5-dimethoxy-4-iodoamphetamine (DOI). Mice were pretreated with vehicle or (-)-quinpirole, DOI was injected 30 minutes later, and then HTR activity was recorded. Data are presented as group means  $\pm$  SEM for the entire 30-minute test session. \* $p < 0.05$ , significant difference between groups (Tukey's test).

Fig. S3

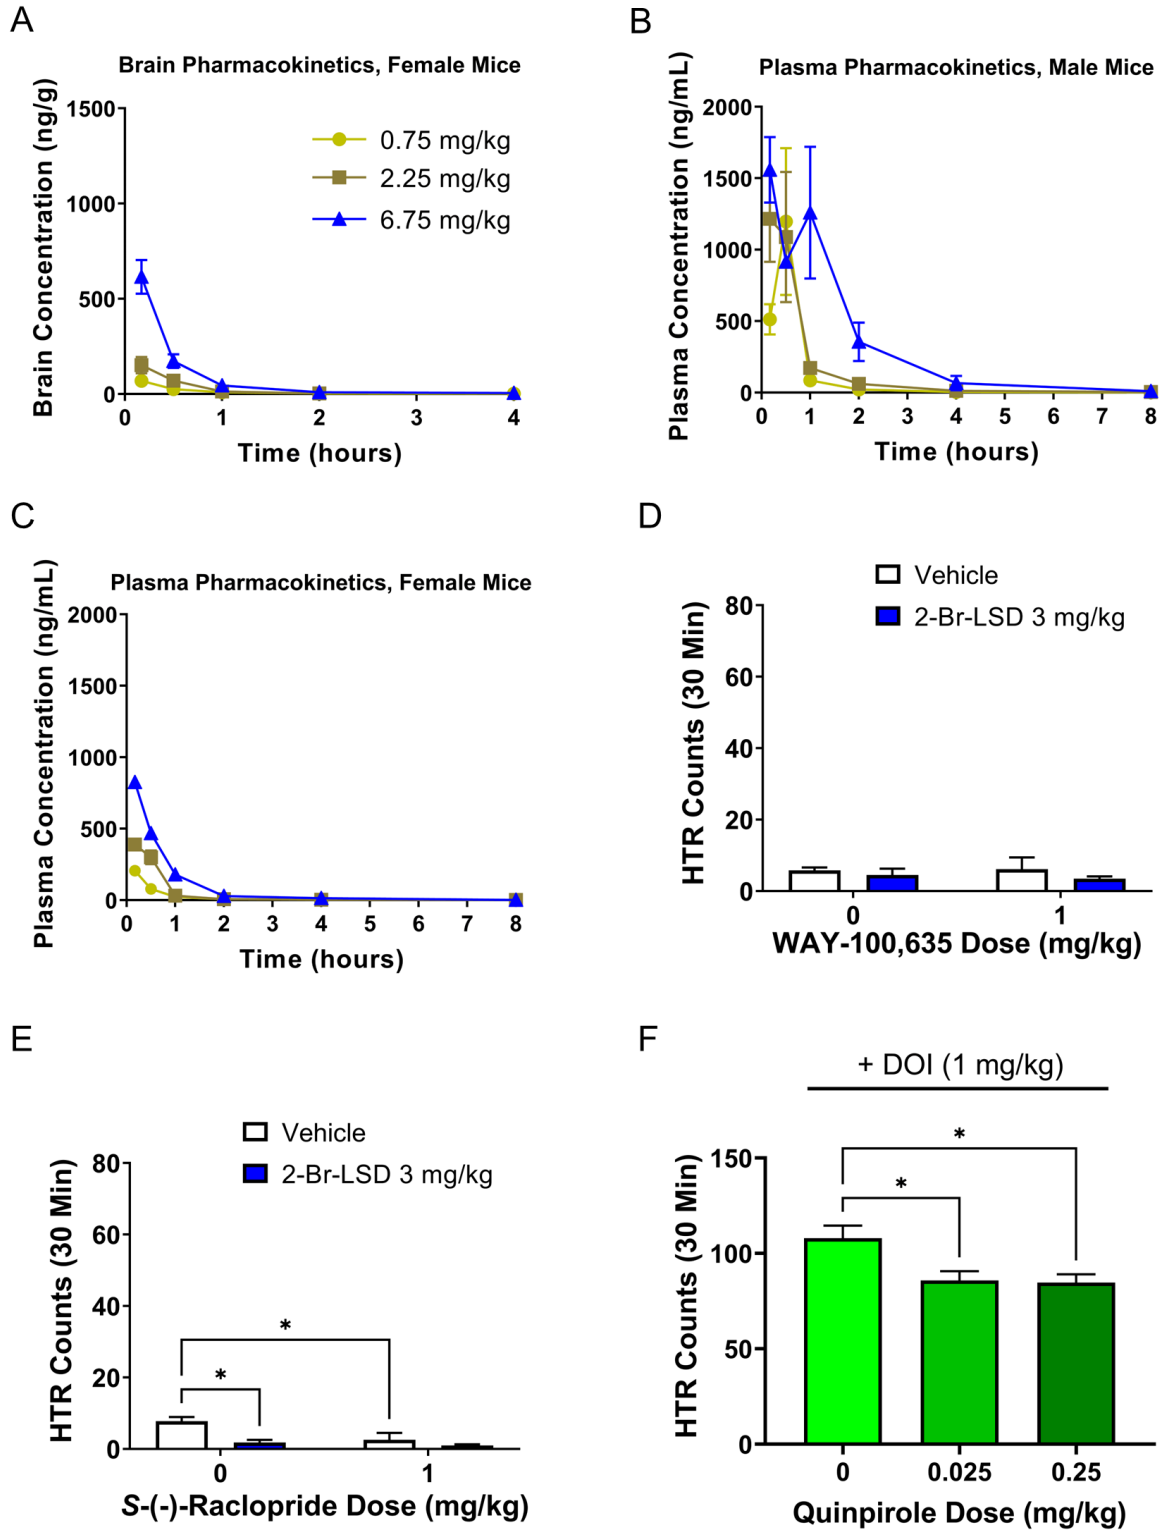

**Figure S4. 2-Br-LSD 5-HT GPCRome G protein versus  $\beta$ -arrestin recruitment profiling.**  
*Related to Figure 4.*

(A-K) Concentration-response curves for 2-Br-LSD comparing G protein dissociation (red) to  $\beta$ -arrestin2 recruitment (blue) at each of the 5-HT subtypes. All data represent mean and SEM from  $n=3$  independent experiments performed in triplicate. Data were normalized to % 5-HT maximum stimulation, and parameter estimates are reported in Table S2.

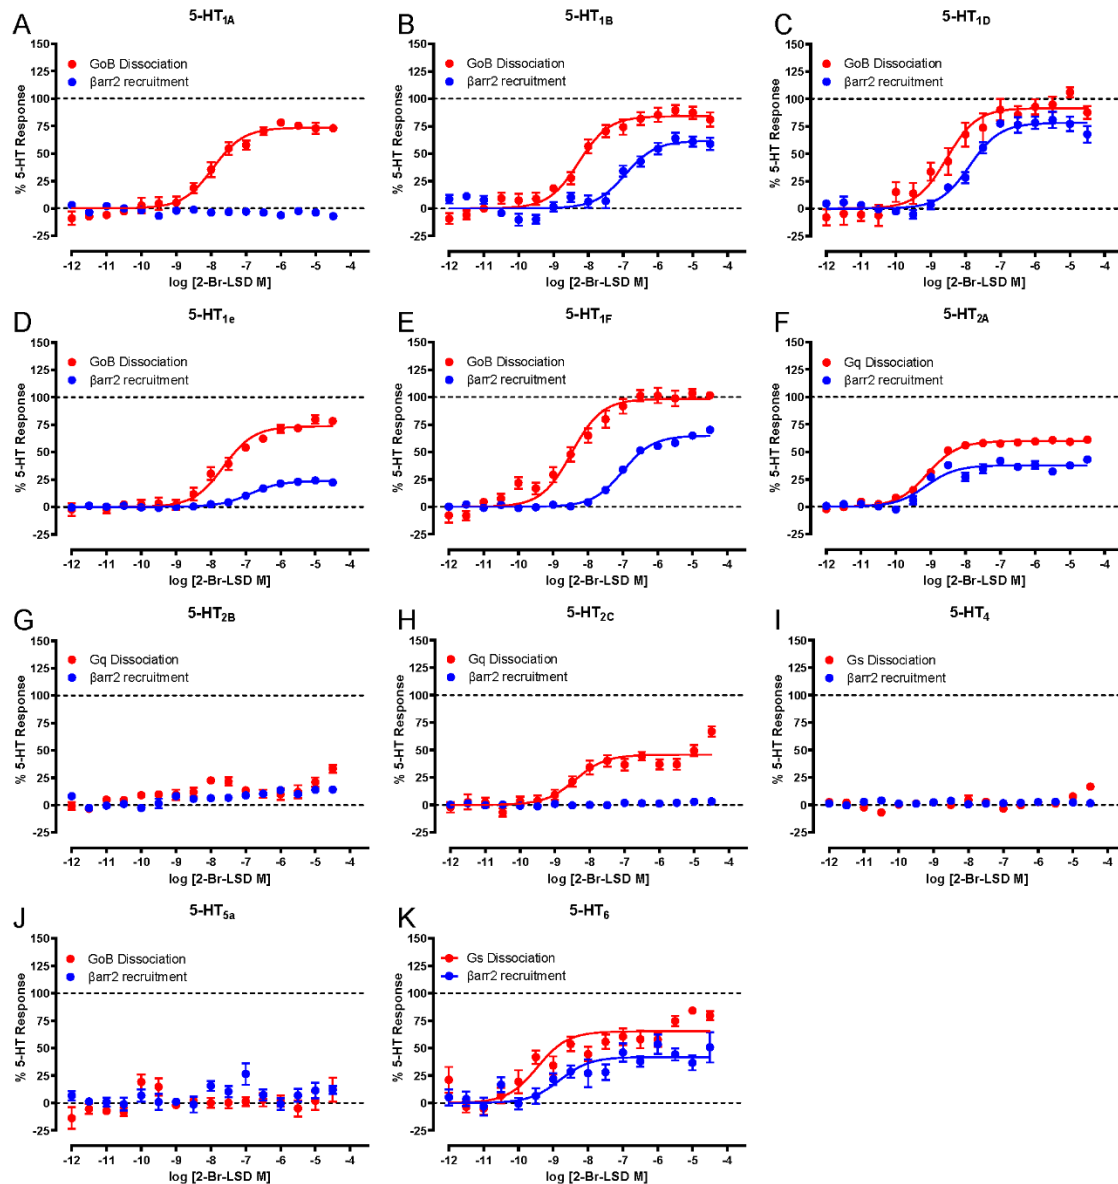

**Figure S5. Neuron Viability and Open Field Activity.** *Related to Figures 5 and 6.*

(A) Neuron viability was determined in rat cortical neurons in culture treated with five concentrations of 2-Br-LSD (0.001, 0.01, 0.1, 1, or 10  $\mu\text{M}$ ) or ketamine. The ratio of living to dead cells was measured at DIV 6; points represent the percentage of live cells ( $n=3$ ). Horizontal lines represent the mean  $\pm$  SEM. (B) and (C) Average heat maps of the location of female and male mice in the open field (from mice described in Fig. 6A-G). Mice had been treated with 2-Br-LSD at 3 different doses (IP, 0.3, 1 or 3 mg/kg) or vehicle 24 hrs prior ( $n=10-11/\text{group}/\text{sex}$ ).

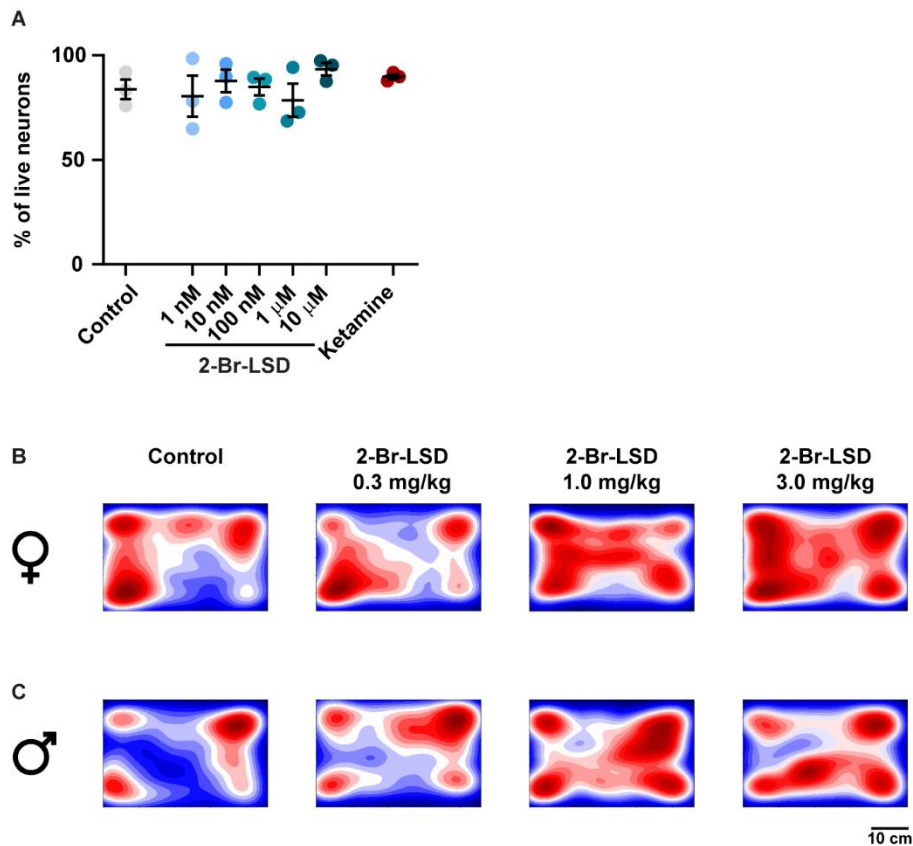



**Figure S6. Center Exploration in Chronic Variable Stress and 2-Br-LSD 5-HT<sub>2A</sub> blockade by Volinanserin.** *Related to Figures 6 and 7.*

(A) and (B) Center exploration and grooming in chronically stressed female mice treated with one dose of 2-Br-LSD (3 mg/kg), four doses of 2-Br-LSD (1 mg/kg), or vehicle (as described in Fig. 6J-M). (A) The effect of 2-Br-LSD treatment on center exploration in the open field, 28 days post-treatment. Horizontal lines represent the mean  $\pm$  SEM. (C) Volinanserin 5-HT<sub>2</sub> selectivity was measured by antagonism of 5-HT-stimulated Gq-mediated calcium flux at 5-HT<sub>2A</sub> (green), 5-HT<sub>2B</sub> (red), and 5-HT<sub>2C</sub> (blue). The concentration of 5-HT used was 2 nM, and IC<sub>50</sub> values of volinanserin are 2.1 nM, >10,000 nM, and 494 nM for 5-HT<sub>2A</sub>, 5-HT<sub>2B</sub>, and 5-HT<sub>2C</sub>, respectively. Data are normalized to percent 5-HT stimulation and represent mean and SEM from at least 3 independent experiments. (D) and (E) 5-HT (black), 2-Br-LSD (blue) and volinanserin blockade of 2-Br-LSD (red) as measured by (D) 5-HT<sub>2A</sub> Gq dissociation (E) and 5-HT<sub>2A</sub>  $\beta$ -arrestin2 recruitment. Volinanserin concentration used was 3  $\mu$ M and was able to block 2-Br-LSD activity up to 10  $\mu$ M. Data are normalized to percent 5-HT stimulation and represent mean and S.E.M from at least 3 independent experiments.

Fig. S6

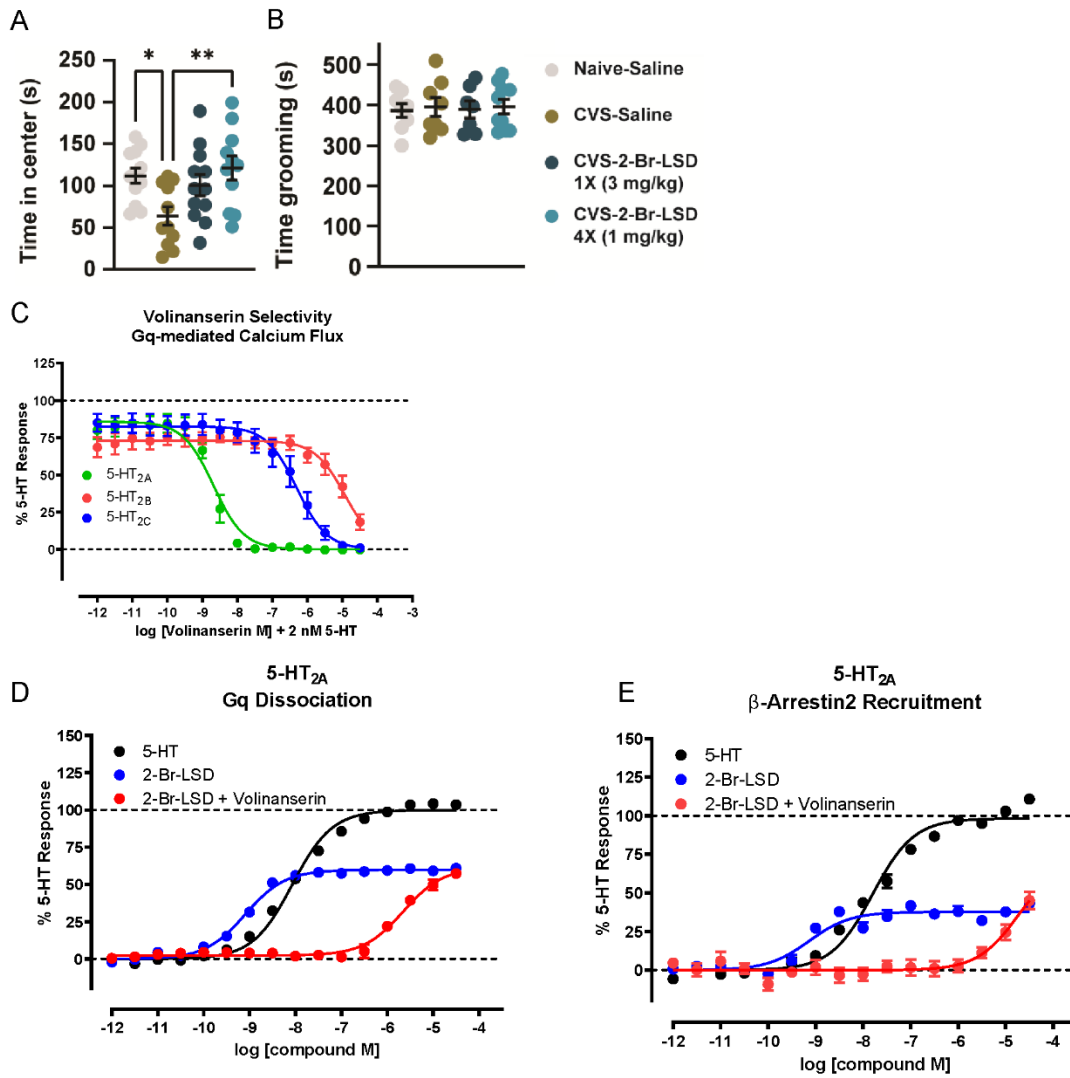

**Table S1. GPCR Aminergic-ome BRET Assay Transfection Conditions**

All aminergic GPCR-ome BRET assays utilized conditions and transfection ratios below. *Related to Figures 1-4.*

| BRET Assay Transfection Conditions |                                  |                                                             |                                      |                            |         |
|------------------------------------|----------------------------------|-------------------------------------------------------------|--------------------------------------|----------------------------|---------|
| GPCR-G-protein                     |                                  | G protein-dissociation ratio                                | $\beta$ -Arrestin2 recruitment ratio | Drug Incubation Time (min) | Temp.   |
| Receptor                           | G $\alpha$ : $\beta$ : $\gamma$  | (Rec:G $\alpha$ -Rluc8: $\beta$ :GFP2- $\gamma$ constructs) | (Rec:GFP-h $\beta$ -Arr2:GRK2)       | G protein, $\beta$ -Arr    | Celsius |
| 5-HT <sub>1A</sub>                 | GoB: $\beta$ 1: $\gamma$ 2       | 1:1:1:1                                                     | 1:15:3                               | 60, 60                     | 37, 37  |
| 5-HT <sub>1B</sub>                 | GoB: $\beta$ 1: $\gamma$ 2       | 1:1:1:1                                                     | 1:15:3                               | 60, 60                     | 37, 37  |
| 5-HT <sub>1D</sub>                 | GoB: $\beta$ 1: $\gamma$ 2       | 1:1:1:1                                                     | 1:15:3                               | 60, 60                     | 37, 37  |
| 5-HT <sub>1e</sub>                 | GoB: $\beta$ 1: $\gamma$ 2       | 1:1:1:1                                                     | 1:15:3                               | 60, 60                     | 37, 37  |
| 5-HT <sub>1F</sub>                 | GoB: $\beta$ 1: $\gamma$ 2       | 1:1:1:1                                                     | 1:15:3                               | 60, 60                     | 37, 37  |
| 5-HT <sub>2A</sub>                 | Gq: $\beta$ 3: $\gamma$ 9        | 1:1:1:1                                                     | 1:15:3                               | 60, 60                     | 37, 37  |
| 5-HT <sub>2B</sub>                 | Gq: $\beta$ 3: $\gamma$ 9        | 1:1:1:1                                                     | 1:15:0                               | 60, 60                     | 37, 37  |
| 5-HT <sub>2C</sub>                 | Gq: $\beta$ 3: $\gamma$ 9        | 1:2:2:2                                                     | 1:15:3                               | 60, 60                     | 37, 37  |
| 5-HT <sub>4</sub>                  | Gs(short): $\beta$ 1: $\gamma$ 1 | 1:1:1:1                                                     | 1:15:0                               | 60, 60                     | 37, 37  |
| 5-HT <sub>5a</sub>                 | GoB: $\beta$ 1: $\gamma$ 2       | 1:1:1:1                                                     | 1:15:3                               | 60, 60                     | 37, 37  |
| 5-HT <sub>6</sub>                  | Gs(short): $\beta$ 1: $\gamma$ 1 | 1:1:1:1                                                     | 1:15:0                               | 60, 5                      | 37, 37  |
| 5-HT <sub>7a</sub>                 | Gs(short): $\beta$ 1: $\gamma$ 1 | 1:1:1:1                                                     | N.T.                                 | 60                         | 37      |
| D <sub>1</sub>                     | Gs(short): $\beta$ 1: $\gamma$ 1 | 1:2:2:2                                                     | N.T.                                 | 60                         | 37      |
| D <sub>2</sub>                     | GoB: $\beta$ 1: $\gamma$ 2       | 1:1:1:1                                                     | N.T.                                 | 60                         | 37      |
| D <sub>3</sub>                     | GoB: $\beta$ 1: $\gamma$ 2       | 1:1:1:1                                                     | N.T.                                 | 60                         | 37      |
| D <sub>4</sub>                     | GoB: $\beta$ 1: $\gamma$ 2       | 1:1:1:1                                                     | N.T.                                 | 60                         | 37      |
| D <sub>5</sub>                     | Gs(short): $\beta$ 1: $\gamma$ 1 | 1:2:2:2                                                     | N.T.                                 | 60                         | 37      |
| ADRA <sub>1A</sub>                 | Gq: $\beta$ 3: $\gamma$ 9        | 1:2:2:2                                                     | N.T.                                 | 60                         | 37      |
| ADRA <sub>1B</sub>                 | Gq: $\beta$ 3: $\gamma$ 9        | 1:2:2:2                                                     | N.T.                                 | 60                         | 37      |

|                   |                                  |         |      |    |    |
|-------------------|----------------------------------|---------|------|----|----|
| ADR $\alpha_{2A}$ | GoB: $\beta$ 1: $\gamma$ 2       | 1:1:1:1 | N.T. | 60 | 37 |
| ADR $\alpha_{2B}$ | GoB: $\beta$ 1: $\gamma$ 2       | 1:1:1:1 | N.T. | 60 | 37 |
| ADR $\alpha_{2C}$ | GoB: $\beta$ 1: $\gamma$ 2       | 1:1:1:1 | N.T. | 60 | 37 |
| ADR $\beta$ 1     | Gs(short): $\beta$ 1: $\gamma$ 1 | 1:2:2:2 | N.T. | 60 | 37 |
| ADR $\beta$ 2     | Gs(short): $\beta$ 1: $\gamma$ 1 | 1:2:2:2 | N.T. | 60 | 37 |
| H1                | Gq: $\beta$ 3: $\gamma$ 9        | 1:2:2:2 | N.T. | 60 | 37 |
| H2                | Gs(short): $\beta$ 1: $\gamma$ 1 | 1:2:2:2 | N.T. | 60 | 37 |
| H3                | GoB: $\beta$ 1: $\gamma$ 2       | 1:1:1:1 | N.T. | 60 | 37 |
| H4                | GoB: $\beta$ 1: $\gamma$ 2       | 1:1:1:1 | N.T. | 60 | 37 |
| CHRM1             | Gq: $\beta$ 3: $\gamma$ 9        | 1:2:2:2 | N.T. | 60 | 37 |
| CHRM2             | GoB: $\beta$ 1: $\gamma$ 2       | 1:1:1:1 | N.T. | 60 | 37 |
| CHRM3             | Gq: $\beta$ 3: $\gamma$ 9        | 1:2:2:2 | N.T. | 60 | 37 |
| CHRM4             | GoB: $\beta$ 1: $\gamma$ 2       | 1:1:1:1 | N.T. | 60 | 37 |
| CHRM5             | Gq: $\beta$ 3: $\gamma$ 9        | 1:2:2:2 | N.T. | 60 | 37 |

**Table S2. Aminergic GPCRome Parameter Estimates for LSD and 2-Br-LSD** All parameter estimates for Aminergic-ome and  $\beta$ -arrestin assays. All data represent mean and SEM from at least n=3 independent experiments. Positive controls used are 5-HT for 5-HT receptors, dopamine for dopamine receptors, norepinephrine for all adrenergic receptors except ADR $\beta$ 2 where epinephrine was used, histamine for all histamine receptors, and pilocarpine for all muscarinic receptors. N.A. no activity; N.C. not calculated; N.D. not determined; N.T. not tested. *Related to Figures 1-4.*

| Receptor            | Positive Control |       |      |       |      | LSD      |       |      |       |      | 2-Br-LSD |       |      |      |      | 2-Br-LSD Antagonist Mode |       |      |
|---------------------|------------------|-------|------|-------|------|----------|-------|------|-------|------|----------|-------|------|------|------|--------------------------|-------|------|
|                     | EC50, nM         | pEC50 | SEM  | Emax  | SEM  | EC50, nM | pEC50 | SEM  | Emax  | SEM  | EC50, nM | pEC50 | SEM  | Emax | SEM  | KB, nM                   | pKB   | SEM  |
| 5-HT1A GoB          | 0.98             | 9.01  | 0.05 | 100.0 | N.D. | 1.31     | 8.88  | 0.05 | 102.2 | 1.5  | 11.3     | 7.95  | 0.08 | 73.4 | 2.0  | N.T.                     |       |      |
| 5-HT1A $\beta$ arr2 | 215              | 6.67  | 0.04 | 100.0 | N.D. | 187      | 6.73  | 0.06 | 67.7  | 1.7  | N.A.     |       |      |      |      | 155                      | 6.81  | 0.10 |
| 5-HT1B GoB          | 0.86             | 9.07  | 0.07 | 100.0 | N.D. | 0.66     | 9.18  | 0.06 | 102.2 | 1.8  | 5.28     | 8.28  | 0.08 | 84.1 | 2.2  | N.T.                     |       |      |
| 5-HT1B $\beta$ arr2 | 16.3             | 7.79  | 0.08 | 100.0 | N.D. | 15.3     | 7.82  | 0.07 | 95.4  | 2.4  | 114      | 6.94  | 0.11 | 61.7 | 2.7  | N.T.                     |       |      |
| 5-HT1D GoB          | 1.07             | 8.97  | 0.11 | 100.0 | N.D. | 0.62     | 9.21  | 0.09 | 103.3 | 2.8  | 2.89     | 8.54  | 0.12 | 91.6 | 3.5  | N.T.                     |       |      |
| 5-HT1D $\beta$ arr2 | 2.41             | 8.62  | 0.07 | 100.0 | N.D. | 1.50     | 8.83  | 0.06 | 93.8  | 1.8  | 13.2     | 7.88  | 0.08 | 78.1 | 2.2  | N.T.                     |       |      |
| 5-HT1e GoB          | 1.07             | 8.97  | 0.05 | 100.0 | N.D. | 2.38     | 8.62  | 0.05 | 98.9  | 1.4  | 23.2     | 7.63  | 0.07 | 73.6 | 2.0  | N.T.                     |       |      |
| 5-HT1e $\beta$ arr2 | 7.18             | 8.14  | 0.02 | 100.0 | N.D. | 28.9     | 7.54  | 0.02 | 99.7  | 0.7  | 131      | 6.88  | 0.05 | 23.6 | 0.5  | 152                      | 6.28  | 0.02 |
| 5-HT1F GoB          | 0.84             | 9.08  | 0.07 | 100.0 | N.D. | 0.72     | 9.14  | 0.07 | 104.9 | 2.1  | 3.37     | 8.47  | 0.08 | 98.3 | 2.4  | N.T.                     |       |      |
| 5-HT1F $\beta$ arr2 | 14.7             | 7.83  | 0.03 | 100.0 | N.D. | 20.3     | 7.69  | 0.03 | 84.9  | 1.0  | 99.1     | 7.00  | 0.04 | 64.9 | 1.0  | 79.7                     | 7.10  | 0.22 |
| 5-HT2A Gq           | 8.52             | 8.07  | 0.02 | 100.0 | N.D. | 0.35     | 9.46  | 0.02 | 91.5  | 0.6  | 0.81     | 9.09  | 0.04 | 59.8 | 0.7  | 0.18                     | 9.75  | 0.11 |
| 5-HT2A $\beta$ arr2 | 15.8             | 7.80  | 0.04 | 100.0 | N.D. | 0.82     | 9.09  | 0.05 | 84.6  | 1.2  | 0.73     | 9.14  | 0.10 | 37.7 | 1.1  | 0.07                     | 10.18 | 0.22 |
| 5-HT2B Gq           | 1.66             | 8.78  | 0.04 | 100.0 | N.D. | 0.30     | 9.53  | 0.08 | 51.0  | 1.2  | N.C.     | N.C.  | N.C. | <20% | N.C. | 3.71                     | 8.43  | 0.13 |
| 5-HT2B $\beta$ arr2 | 3.26             | 8.49  | 0.04 | 100.0 | N.D. | 1.51     | 8.82  | 0.08 | 45.1  | 1.1  | N.C.     | N.C.  | N.C. | <20% | N.C. | 3.09                     | 8.51  | 0.27 |
| 5-HT2C Gq           | 0.28             | 9.56  | 0.05 | 100.0 | N.D. | 0.66     | 9.18  | 0.05 | 89.8  | 1.4  | 3.85     | 8.41  | 0.14 | 45.8 | 2.1  | 1.53                     | 8.82  | 0.22 |
| 5-HT2C $\beta$ arr2 | 2.86             | 8.54  | 0.04 | 100.0 | N.D. | 3.92     | 8.41  | 0.05 | 35.0  | 0.5  | N.A.     |       |      |      |      | 2.64                     | 8.58  | 0.07 |
| 5-HT4 Gs            | 8.29             | 8.08  | 0.03 | 100.0 | N.D. | >10,000  | <5.00 | N.C. | N.C.  | N.C. | >10,000  | <5.00 | N.D. | N.D. | N.D. | >10,000                  | <5.00 | N.D. |
| 5-HT4 $\beta$ arr2  | 28.5             | 7.55  | 0.03 | 100.0 | N.D. | N.A.     |       |      |       |      | N.A.     |       |      |      |      | >10,000                  | <5.00 | N.D. |
| 5-HT5a GoB          | 61.5             | 7.21  | 0.07 | 100.0 | N.D. | 2.33     | 8.63  | 0.16 | 38.7  | 1.9  | N.A.     |       |      |      |      | 4.14                     | 8.38  | 0.14 |
| 5-HT5a $\beta$ arr2 | 18.4             | 7.74  | 0.09 | 100.0 | N.D. | 1.30     | 8.89  | 0.15 | 64.5  | 2.8  | N.D.     | N.D.  | N.D. | <20% | N.D. | 1.07                     | 8.97  | 0.33 |
| 5-HT6 Gs            | 29.9             | 7.52  | 0.10 | 100.0 | N.D. | 0.13     | 9.90  | 0.10 | 75.0  | 2.0  | 0.35     | 9.45  | 0.14 | 65.3 | 2.8  | N.T.                     |       |      |
| 5-HT6 $\beta$ arr2  | 91.4             | 7.04  | 0.11 | 100.0 | N.D. | 2.90     | 8.54  | 0.12 | 82.6  | 3.3  | 1.55     | 8.81  | 0.23 | 41.9 | 3.0  | N.T.                     |       |      |
| 5-HT7a Gs           | 11.4             | 7.94  | 0.07 | 100.0 | N.D. | 1.74     | 8.76  | 0.69 | 11.1  | 2.3  | N.A.     |       |      |      |      | 1.44                     | 8.84  | 0.22 |
| 5-HT7a $\beta$ arr2 | N.T.             |       |      |       |      |          |       |      |       |      |          |       |      |      |      |                          |       |      |
| D1 Gs               | 295              | 6.53  | 0.05 | 100.0 | N.D. | 108      | 6.97  | 0.11 | 41.3  | 2.0  | N.A.     |       |      |      |      | 33.0                     | 7.48  | 0.54 |
| D2 GoB              | 4.92             | 8.31  | 0.09 | 100.0 | N.D. | 2.17     | 8.66  | 0.10 | 86.0  | 2.8  | 0.35     | 9.45  | 0.12 | 77.4 | 2.72 | N.D.                     |       |      |
| D3 GoB              | 0.35             | 9.46  | 0.08 | 100.0 | N.D. | 7.57     | 8.12  | 0.12 | 74.5  | 3.0  | 2.84     | 8.55  | 0.19 | 31.8 | 1.94 | 7.13                     | 8.15  | 0.28 |
| D4 GoB              | 3.52             | 8.45  | 0.07 | 100.0 | N.D. | 4.03     | 8.40  | 0.10 | 91.9  | 2.8  | 1.22     | 8.91  | 0.09 | 67.3 | 1.76 | N.D.                     |       |      |
| D5 Gs               | 75.5             | 7.12  | 0.07 | 100.0 | N.D. | 166      | 6.78  | 0.11 | 70.7  | 3.4  | N.D.     | N.D.  | N.D. | <20% | N.D. | 25.1                     | 7.60  | 1.02 |
| ADRA1A Gq           | 25.7             | 7.59  | 0.02 | 100.0 | N.D. | 38.5     | 7.42  | 0.12 | 24.8  | 1.1  | N.D.     | N.D.  | N.D. | <20% | N.D. | 56.9                     | 7.25  | 0.23 |
| ADRA1B Gq           | 65.6             | 7.18  | 0.05 | 100.0 | N.D. | N.A.     |       |      |       |      | N.A.     |       |      |      |      | 55.9                     | 7.41  | 0.30 |
| ADRA1D              | N.T.             |       |      |       |      |          |       |      |       |      |          |       |      |      |      |                          |       |      |
| ADRA2A GoB          | 1.91             | 8.72  | 0.05 | 100.0 | N.D. | 19.4     | 7.71  | 0.12 | 64.7  | 2.7  | N.A.     |       |      |      |      | 11.9                     | 7.92  | 0.41 |
| ADRA2B GoB          | 4.26             | 8.37  | 0.06 | 100.0 | N.D. | 11.8     | 7.93  | 0.10 | 61.8  | 2.1  | N.A.     |       |      |      |      | 79.2                     | 7.10  | 0.33 |
| ADRA2C GoB          | 0.49             | 9.31  | 0.06 | 100.0 | N.D. | 0.56     | 9.25  | 0.11 | 80.2  | 3.9  | 10.4     | 8.0   | 0.21 | 40.5 | 2.97 | 16.0                     | 7.80  | 0.93 |
| ADRB1 Gs            | 55.8             | 7.25  | 0.06 | 100.0 | N.D. | N.A.     |       |      |       |      | N.A.     |       |      |      |      | 95.2                     | 7.02  | 0.24 |
| ADRB2 Gs            | 39.3             | 7.41  | 0.06 | 100.0 | N.D. | N.A.     |       |      |       |      | N.A.     |       |      |      |      | 17.6                     | 7.75  | 0.19 |
| H1 Gq               | 102              | 6.99  | 0.04 | 100.0 | N.D. | N.D.     | N.D.  | N.D. | <20%  | N.D. | N.A.     |       |      |      |      | 983                      | 6.01  | 0.09 |
| H2 Gs               | 1288             | 5.89  | 0.04 | 100.0 | N.D. | 3014     | 5.52  | 0.19 | 21.2  | 2.1  | 296      | 6.53  | 0.12 | 28.8 | 1.39 | 5188                     | 5.29  | 0.39 |
| H3 GoB              | 4.56             | 8.34  | 0.07 | 100.0 | N.D. | N.A.     |       |      |       |      | N.A.     |       |      |      |      | N.D.                     |       |      |
| H4 GoB              | 32.1             | 7.49  | 0.10 | 100.0 | N.D. | N.A.     |       |      |       |      | N.A.     |       |      |      |      | N.D.                     |       |      |
| CHRM1 Gq            | 619              | 6.21  | 0.04 | 100.0 | N.D. | N.A.     |       |      |       |      | N.A.     |       |      |      |      | N.D.                     |       |      |
| CHRM2 GoB           | 120              | 6.92  | 0.07 | 100.0 | N.D. | N.A.     |       |      |       |      | N.A.     |       |      |      |      | N.D.                     |       |      |
| CHRM3 Gq            | 551              | 6.41  | 0.04 | 100.0 | N.D. | N.A.     |       |      |       |      | N.A.     |       |      |      |      | N.D.                     |       |      |
| CHRM4 GoB           | 112              | 6.95  | 0.09 | 100.0 | N.D. | N.A.     |       |      |       |      | N.A.     |       |      |      |      | N.D.                     |       |      |
| CHRM5 Gq            | 374              | 6.43  | 0.04 | 100.0 | N.D. | N.A.     |       |      |       |      | N.A.     |       |      |      |      | N.D.                     |       |      |

**Table S3. GPCR Receptor Radioligand Binding Affinities**

2-Br-LSD was evaluated by Eurofins Discovery, examining binding affinity in modes specified below. *Related to Figures 1 and 3.*

| <b>Receptor</b> | <b>Mode</b> | <b>radioligand</b> | <b>Ki (nM)</b> |
|-----------------|-------------|--------------------|----------------|
| 5-HT1A          | agonist     | 8-OH-DPAT          | 9.3            |
| 5-HT1B          | antagonist  | GR125743           | 77             |
| 5-HT2A          | agonist     | DOI                | 2.2            |
| 5-HT2B          | agonist     | DOI                | 7              |
| 5-HT2C          | agonist     | DOI                | 19             |
| 5-HT7           | agonist     | LSD                | 3.81           |
| $\alpha$ 1A     | antagonist  | WB 4101            | 59             |
| $\alpha$ 2A     | antagonist  | yohimbine          | 10.3           |
| $\alpha$ 2B     | antagonist  | yohimbine          | 27             |
| $\alpha$ 2C     | antagonist  | yohimbine          | 27             |
| $\beta$ 1       | agonist     | atenolol           | 110            |
| $\beta$ 2       | antagonist  | ICI 118551         | 88             |
| D1              | antagonist  | SCH 23390          | 25             |
| D2              | agonist     | 7-OH-DPAT          | 2.1            |

**Table S4. Mouse Plasma Pharmacokinetic Data**

2-Br-LSD was evaluated by Nucro-Technics according to their standard operating procedures.  
*Related to Figure 2.*

| Dose (mg/kg) | Sex | Plasma                   |                      |               |                      | Brain                   |                      |                      | Brain/plasma ratio 0.17 h | Brain/plasma ratio 0.5 h |
|--------------|-----|--------------------------|----------------------|---------------|----------------------|-------------------------|----------------------|----------------------|---------------------------|--------------------------|
|              |     | C <sub>max</sub> (ng/mL) | T <sub>max</sub> (h) | AUC (h*ng/mL) | T <sub>1/2</sub> (h) | C <sub>max</sub> (ng/g) | T <sub>max</sub> (h) | T <sub>1/2</sub> (h) |                           |                          |
| 0.75         | M   | 1197.48                  | 0.5                  | 740           | 1.3                  | 166.34                  | 0.17                 | 0.7                  | 0.32                      | 0.05                     |
| 2.25         | M   | 1215.83                  | 0.2                  | 1024          | 1.4                  | 324.88                  | 0.17                 | 0.8                  | 0.27                      | 0.09                     |
| 6.75         | M   | 1558.74                  | 0.2                  | 2438          | 1.2                  | 1139.87                 | 0.17                 | 1.0                  | 0.73                      | 0.37                     |
| 0.75         | F   | 206.49                   | 0.2                  | 117           | 0.9                  | 69.78                   | 0.17                 | 1.3                  | 0.34                      | 0.32                     |
| 2.25         | F   | 389.35                   | 0.2                  | 270           | 2.6                  | 152.02                  | 0.17                 | 0.4                  | 0.39                      | 0.85                     |
| 6.75         | F   | 826.06                   | 0.2                  | 626           | 1.7                  | 615.76                  | 0.17                 | 0.8                  | 0.75                      | 0.37                     |

**Table S5. 2-Br-LSD Safety Pharmacological Screen**

2-Br-LSD was evaluated by Eurofins Discovery in their SafetyScan, examining functional activity in modes specified below. *Related to Figure 3.*

| Target Class | Target Name                       | Assay Name                | Mode       | Results type | $\mu\text{M}$ | Reference Control                                              |
|--------------|-----------------------------------|---------------------------|------------|--------------|---------------|----------------------------------------------------------------|
| GPCR         | Adenosine A2a Receptor            | Calcium Flux              | Agonist    | EC50         | >100          | NECA                                                           |
| NHR          | Androgen Receptor                 | NHR Nuclear Translocation | Agonist    | EC50         | >100          | BMS-564929                                                     |
| GPCR         | Arginine vasopressin receptor 1A  | Calcium Flux              | Agonist    | EC50         | >100          | [Arg8]-Vasopressin                                             |
| GPCR         | Cholecystokinin A Receptor        | Calcium Flux              | Agonist    | EC50         | >100          | (Tyr[SO <sub>3</sub> H]27)Cholecystokinin fragment 26-33 Amide |
| GPCR         | Cholinergic Receptor Muscarinic 1 | Calcium Flux              | Agonist    | EC50         | >100          | Acetylcholine chloride                                         |
| GPCR         | Cholinergic Receptor Muscarinic 2 | cAMP                      | Agonist    | EC50         | >100          | Acetylcholine chloride                                         |
| GPCR         | Cholinergic Receptor Muscarinic 3 | Calcium Flux              | Agonist    | EC50         | >100          | Acetylcholine chloride                                         |
| GPCR         | Cannabinoid Receptor 1            | cAMP                      | Agonist    | EC50         | >100          | CP 55940                                                       |
| GPCR         | Cannabinoid Receptor 2            | cAMP                      | Agonist    | EC50         | >100          | CP 55940                                                       |
| GPCR         | Endothelin Receptor Type A        | Calcium Flux              | Agonist    | EC50         | >100          | Endothelin 1                                                   |
| NHR          | Glucocorticoid receptor           | NHR Protein Interaction   | Agonist    | EC50         | >100          | Dexamethasone                                                  |
| GPCR         | Opioid Receptor Delta 1           | cAMP                      | Agonist    | EC50         | >100          | DADLE                                                          |
| GPCR         | Opioid Receptor Kappa 1           | cAMP                      | Agonist    | EC50         | >100          | Dynorphin A (1-17)                                             |
| GPCR         | Opioid Receptor Mu 1              | cAMP                      | Agonist    | EC50         | >100          | DAMGO                                                          |
| GPCR         | Adenosine A2a Receptor            | Calcium Flux              | Antagonist | IC50         | >100          | SCH 442416                                                     |
| NHR          | Androgen Receptor                 | NHR Nuclear Translocation | Antagonist | IC50         | >100          | Geldanamycin                                                   |
| GPCR         | Arginine vasopressin receptor 1A  | Calcium Flux              | Antagonist | IC50         | >100          | SR 49059                                                       |
| GPCR         | Cholecystokinin A Receptor        | Calcium Flux              | Antagonist | IC50         | >100          | SR 27897                                                       |
| GPCR         | Cholinergic Receptor Muscarinic 1 | Calcium Flux              | Antagonist | IC50         | >100          | Atropine                                                       |
| GPCR         | Cholinergic Receptor Muscarinic 2 | cAMP                      | Antagonist | IC50         | >100          | Atropine                                                       |



|                    |                                                   |                         |            |      |       |                        |
|--------------------|---------------------------------------------------|-------------------------|------------|------|-------|------------------------|
| GPCR               | Cholinergic Receptor Muscarinic 3                 | Calcium Flux            | Antagonist | IC50 | >100  | Atropine               |
| GPCR               | Cannabinoid Receptor 1                            | cAMP                    | Antagonist | IC50 | >100  | AM 251                 |
| GPCR               | Cannabinoid Receptor 2                            | cAMP                    | Antagonist | IC50 | >100  | SR 144528              |
| GPCR               | Endothelin Receptor Type A                        | Calcium Flux            | Antagonist | IC50 | >100  | BMS 182874             |
| NHR                | Glucocorticoid receptor                           | NHR Protein Interaction | Antagonist | IC50 | >100  | Mifepristone           |
| GPCR               | Opioid Receptor Delta 1                           | cAMP                    | Antagonist | IC50 | >100  | Naltriben              |
| GPCR               | Opioid Receptor Kappa 1                           | cAMP                    | Antagonist | IC50 | >100  | nor-Binaltorphimine    |
| GPCR               | Opioid Receptor Mu 1                              | cAMP                    | Antagonist | IC50 | >100  | Naloxone               |
| Ion Channel        | L-type Cav1.2 calcium channel                     | Ion Channel             | Blocker    | IC50 | 66.71 | Isradipine             |
| Ion Channel        | GABA A Receptor                                   | Ion Channel             | Blocker    | IC50 | >100  | Picrotoxin             |
| Ion Channel        | hERG potassium ion channel                        | Ion Channel             | Blocker    | IC50 | 31.59 | Astemizole             |
| Ion Channel        | 5-HT Receptor 3A                                  | Ion Channel             | Blocker    | IC50 | 45.44 | Bemesetron             |
| Ion Channel        | KvLQT1 potassium channel                          | Ion Channel             | Blocker    | IC50 | >100  | XE 991                 |
| Ion Channel        | Alpha-4 beta-2 nicotinic receptor                 | Ion Channel             | Blocker    | IC50 | 36.37 | Dihydro-β-erythroidine |
| Ion Channel        | NAV1.5 voltage-gated sodium channel               | Ion Channel             | Blocker    | IC50 | 1.10  | Lidocaine              |
| Ion Channel        | Glutamate ionotropic receptor NMDA type subunit 1 | Ion Channel             | Blocker    | IC50 | >100  | (+)-MK 801 maleate     |
| Transporter        | Norepinephrine transporter (NET)                  | Transporter             | Blocker    | IC50 | >100  | Desipramine            |
| Transporter        | Dopamine transporter (DAT)                        | Transporter             | Blocker    | IC50 | >100  | GBR 12909              |
| Transporter        | Serotonin transporter (SERT)                      | Transporter             | Blocker    | IC50 | >100  | Clomipramine           |
| Non-Kinase Enzymes | Acetylcholinesterase                              | Enzymatic               | Inhibitor  | IC50 | 8.36  | Physostigmine          |
| Non-Kinase Enzymes | Cytochrome C Oxidase 1 (COX1)                     | Enzymatic               | Inhibitor  | IC50 | >100  | Indomethacin           |
| Non-Kinase Enzymes | Cytochrome C Oxidase 2 (COX2)                     | Enzymatic               | Inhibitor  | IC50 | 43.8  | NS-398                 |
| Kinases            | Insulin Receptor                                  | Binding                 | Inhibitor  | IC50 | >100  | BMS-754807             |

|                    |                                                   |             |           |      |      |                         |
|--------------------|---------------------------------------------------|-------------|-----------|------|------|-------------------------|
| Kinases            | Lymphocyte-specific protein tyrosine kinase       | Binding     | Inhibitor | IC50 | >100 | Gleevec                 |
| Non-Kinase Enzymes | Monoamine oxidase A                               | Enzymatic   | Inhibitor | IC50 | >100 | Clorgyline              |
| Non-Kinase Enzymes | Phosphodiesterase 3A                              | Enzymatic   | Inhibitor | IC50 | >100 | Cilostamide             |
| Non-Kinase Enzymes | cAMP-specific 3',5'-cyclic phosphodiesterase 4D   | Enzymatic   | Inhibitor | IC50 | 54.6 | Cilomilast              |
| Kinases            | Rho-associated coiled-coil kinase 1               | Binding     | Inhibitor | IC50 | >100 | Staurosporine           |
| Kinases            | Vascular endothelial growth factor receptor 2     | Binding     | Inhibitor | IC50 | >100 | SU-11248                |
| Ion Channel        | GABA A Receptor                                   | Ion Channel | Opener    | EC50 | >100 | GABA                    |
| Ion Channel        | 5-HT Receptor 3A                                  | Ion Channel | Opener    | EC50 | >100 | Serotonin Hydrochloride |
| Ion Channel        | KvLQT1 potassium channel                          | Ion Channel | Opener    | EC50 | >100 | ML-277                  |
| Ion Channel        | Alpha-4 beta-2 nicotinic receptor                 | Ion Channel | Opener    | EC50 | >100 | (-)-Nicotine            |
| Ion Channel        | Glutamate ionotropic receptor NMDA type subunit 1 | Ion Channel | Opener    | EC50 | >100 | L-Glutamic Acid         |

**Table S6. 2-Br-LSD Safety Pharmacological Screen (Transporter Inhibition Assay)**

2-Br-LSD was evaluated by Eurofins Discovery, examining transporter affinity in modes specified below. *Related to Figure 3.*

| Target Name   | % Inhibition of Control (10 $\mu$ M 2-Br-LSD) | IC50 ( $\mu$ M)* | Reference Compound |
|---------------|-----------------------------------------------|------------------|--------------------|
| OCT2          | 75.6376                                       | 0.5              | verapamil          |
| P-gp          | 60.7608                                       | 7                | verapamil          |
| OATP1B3       | 41.1618                                       | 8.3              | Rifampicin         |
| OAT3          | 30.7252                                       | 6.7              | Probenecid         |
| OCT1          | 18.7826                                       | >100             | verapamil          |
| MATE2-K       | 17.7685                                       | na               | verapamil          |
| OATP1B1       | 14.2799                                       | na               | Rifampicin         |
| BCRP          | 12.0292                                       | na               | KO143              |
| MRP2          | 2.20263                                       | na               | MK571              |
| OAT1          | 0.11207                                       | na               | Probenecid         |
| BSEP          | -2.07                                         | na               | Cyclosporine A     |
| MATE1         | -20.5                                         | na               | verapamil          |
| Glycine (rat) | 7                                             | na               | Sarcosine          |
| VMAT2 (rat)   | 22                                            | >100             | Tetrabenazine      |
